# Supplementary material
Source: publisher site journal article supplement (https://static.cambridge.org/content/id/urn:cambridge.org:id:article:S0007114519003374/resource/name/S0007114519003374supp001.docx)
Supplement: Supplementary file 1 [file S0007114519003374supp001.docx]

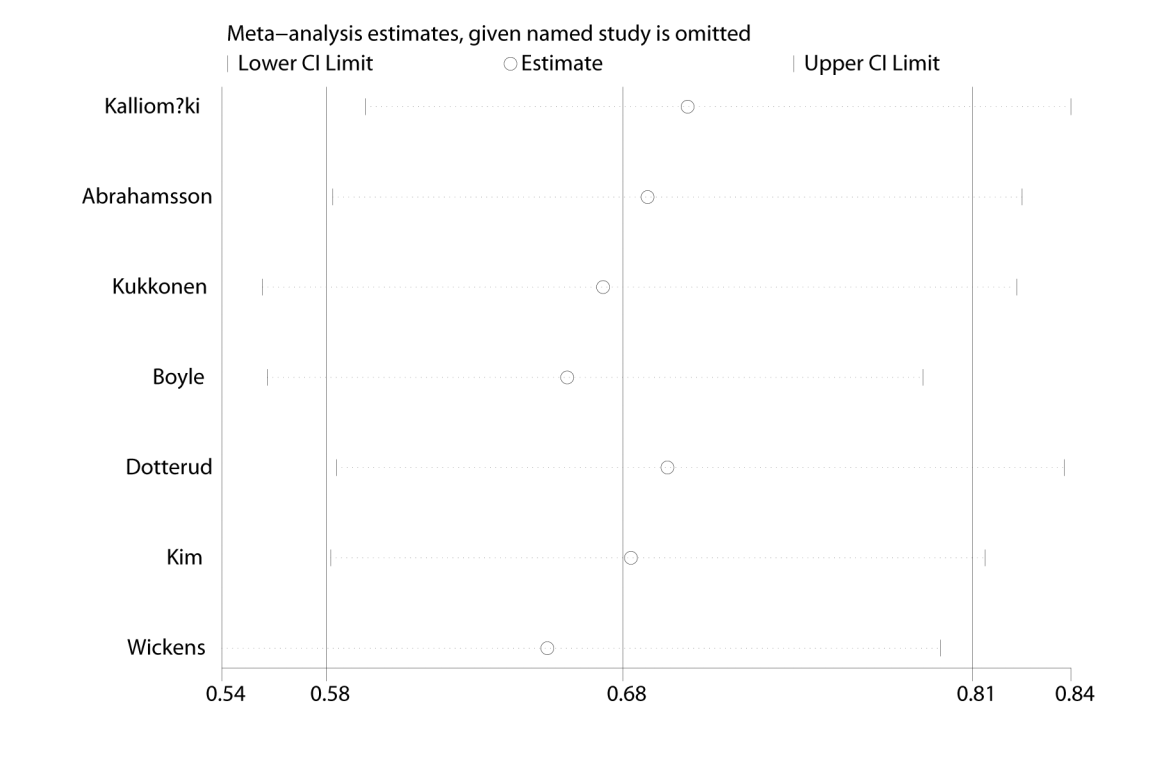


Figure S1. sensitivity analysis for atopic eczema


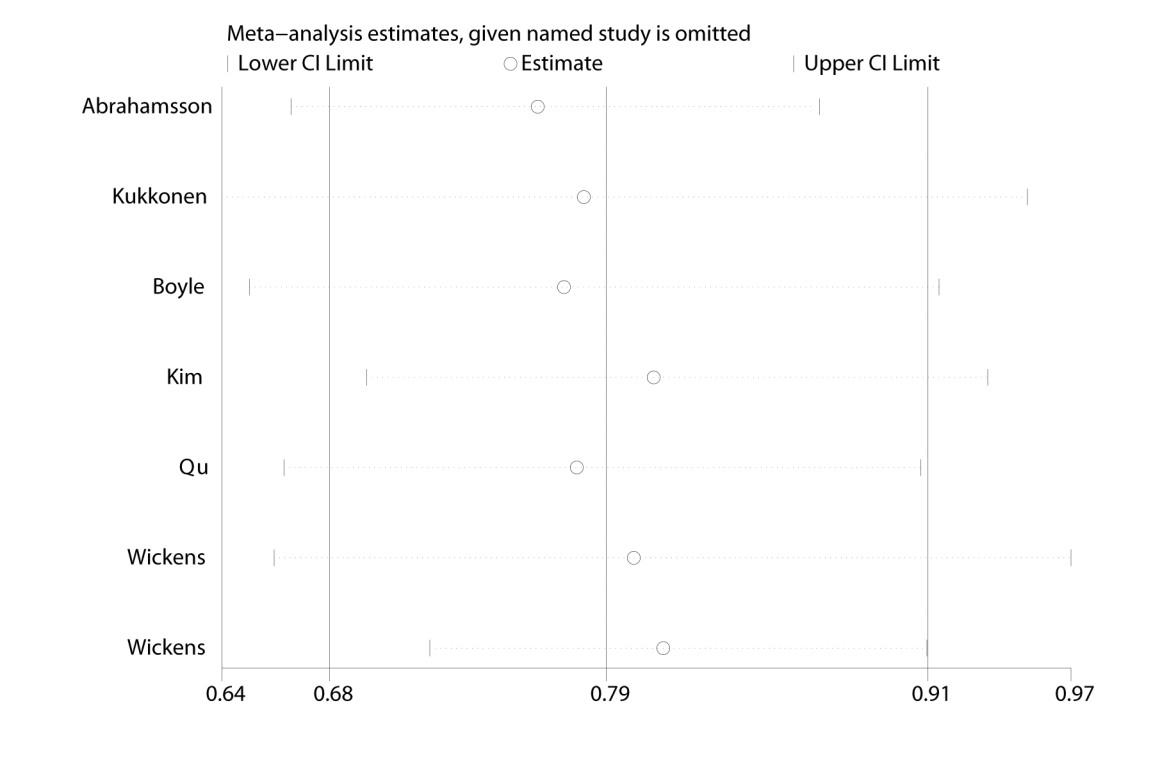


Figure S2. sensitivity analysis for eczema


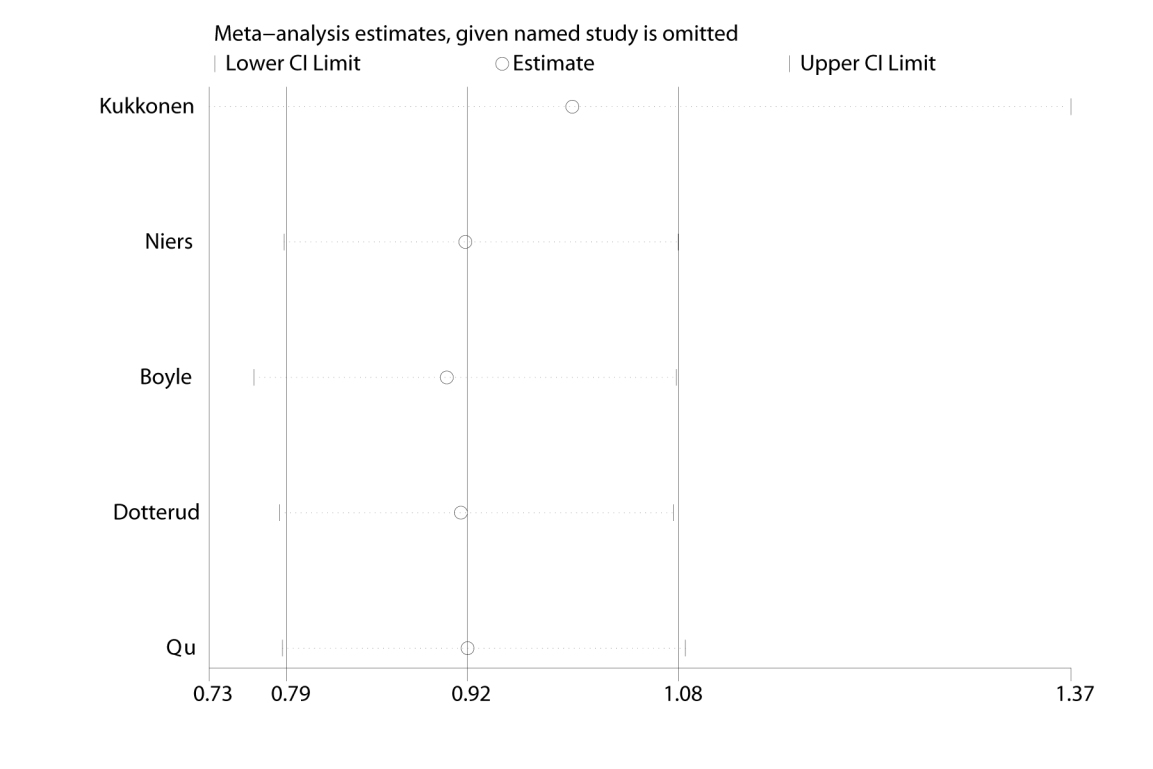


Figure S3. sensitivity analysis for allergic disease


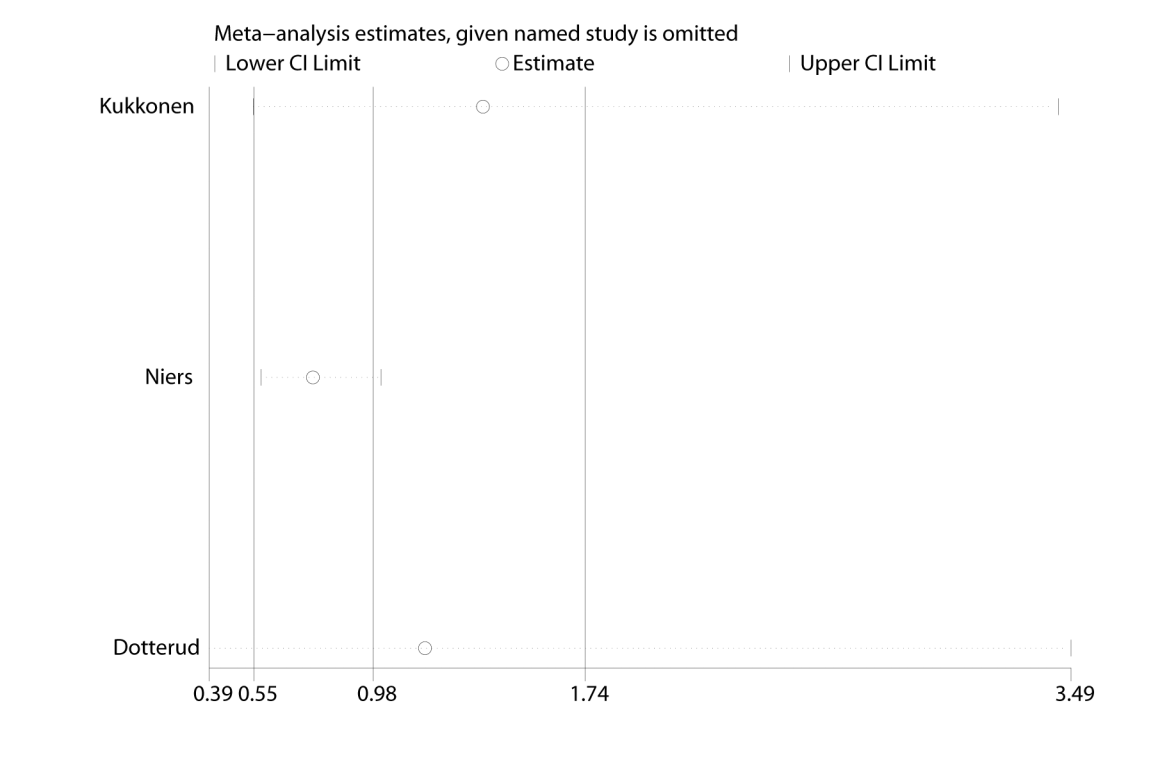


Figure S4. sensitivity analysis for IgE-associated allergic disease


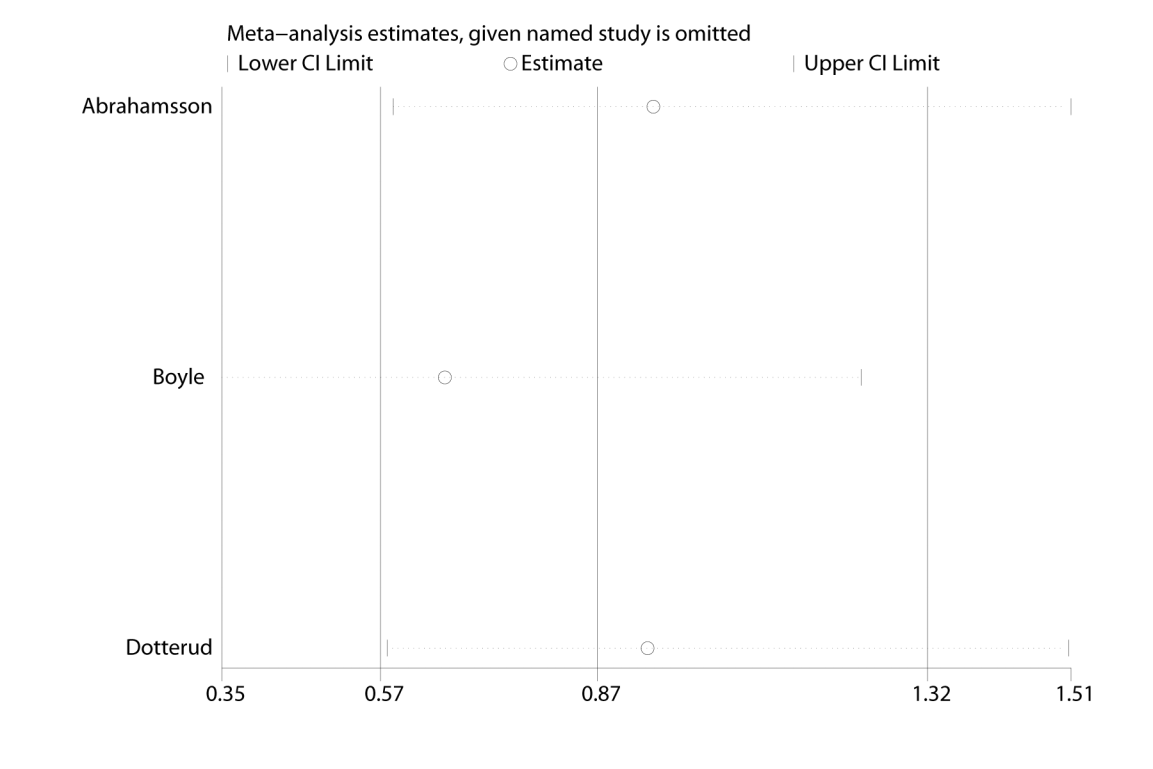


Figure S5. sensitivity analysis for asthma


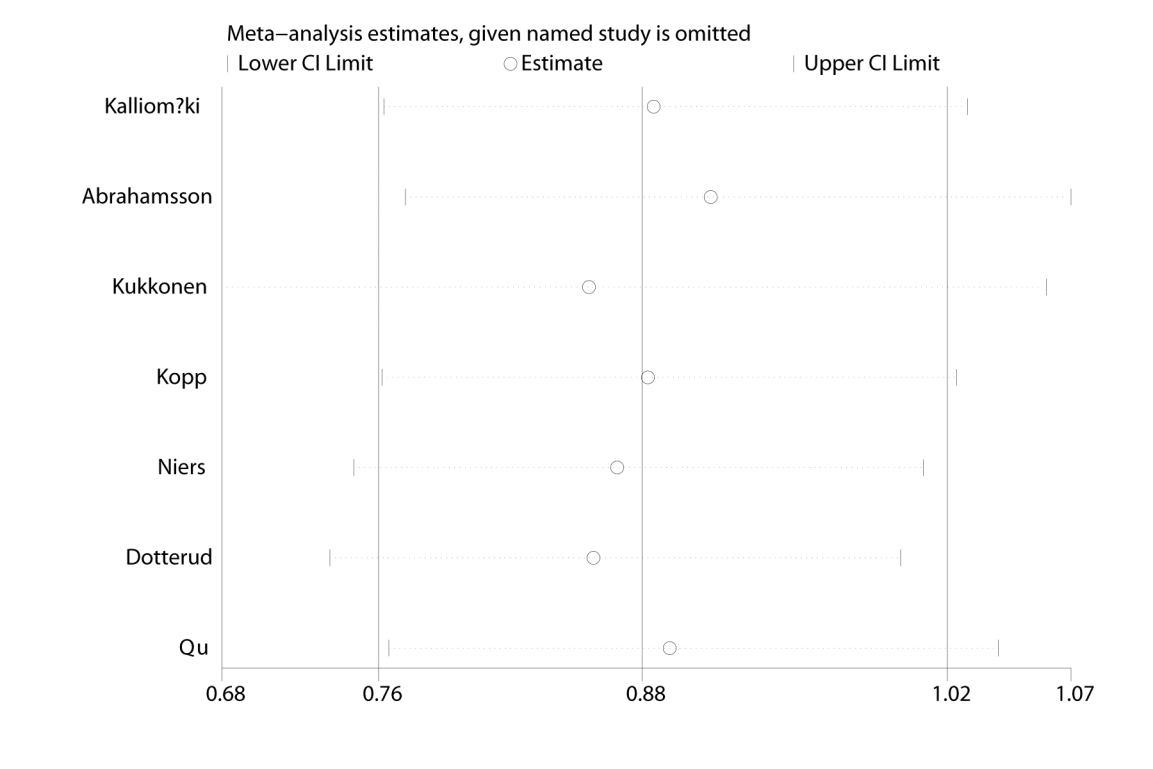


Figure S6. sensitivity analysis for sensitization


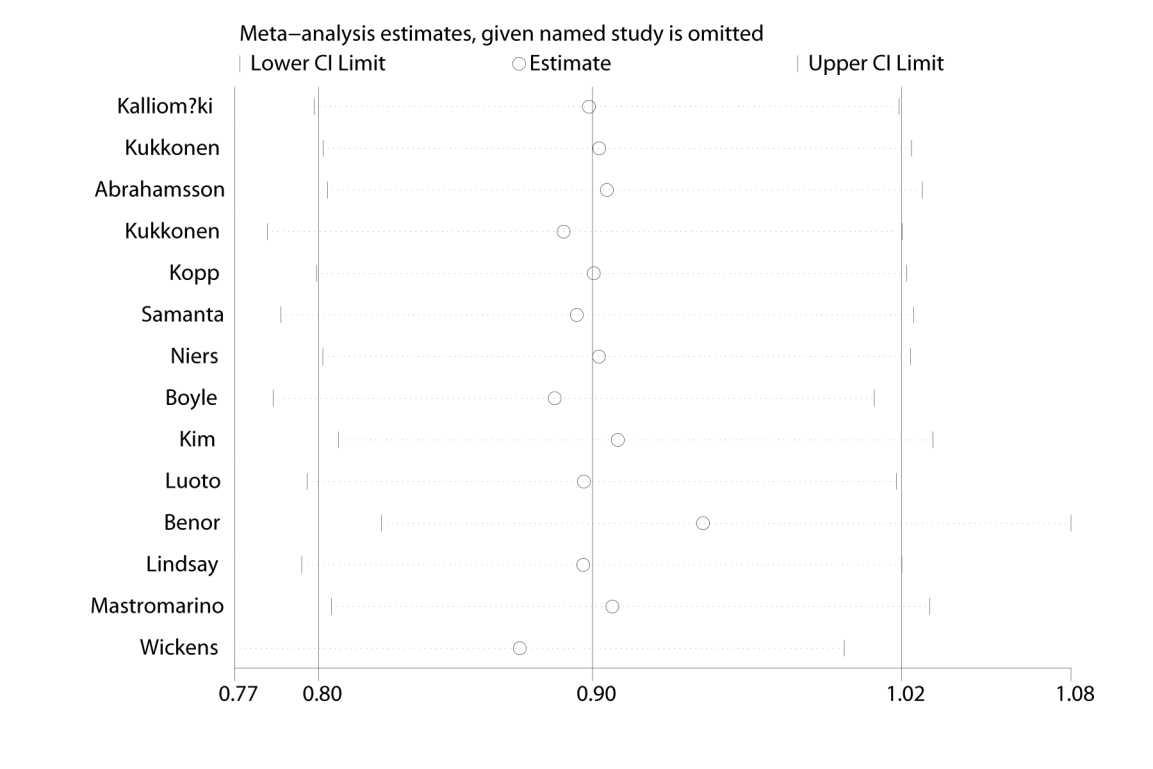


Figure S7. sensitivity analysis for caesarian section


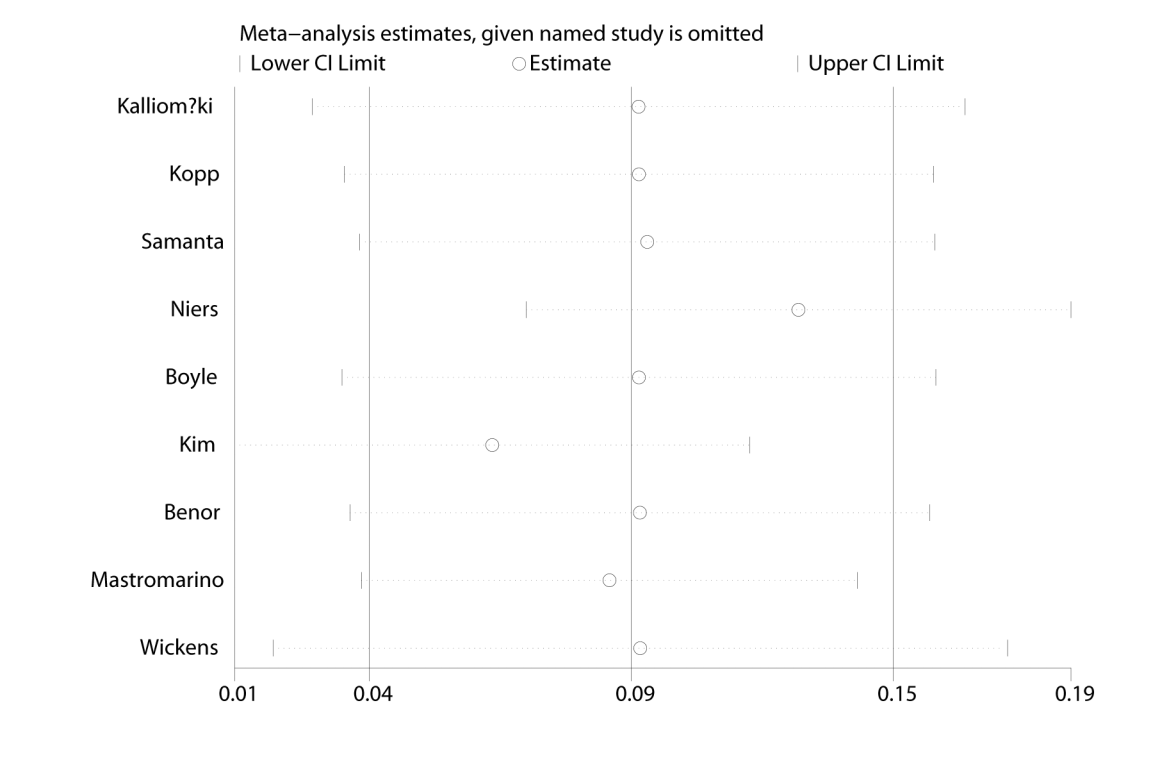


Figure S8. sensitivity analysis for gestational age


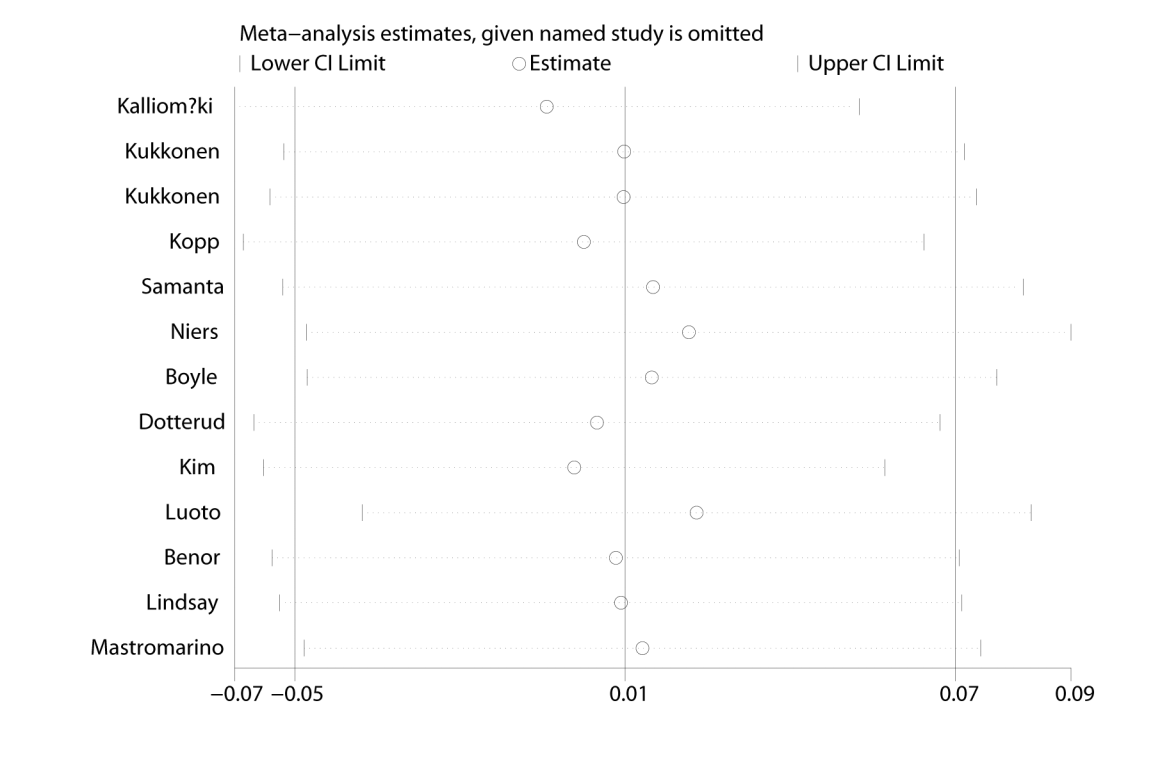


Figure S9. sensitivity analysis for birth weight
